# Supplementary material for: Humidity sensitive properties of alkoxysilane-crosslinked polyelectrolyte using sol-gel processElectronic supplementary information (ESI) available: Figures of humidity sensor durability and stability tests. See http://www.rsc.org/suppdata/an/b4/b404334k/
Source: Royal Society of Chemistry journal article supplement (doi:10.1039/b404334k), 2004-01-01
Supplement: b404334k.doc [file b404334k.doc]

S1. Durability test (measured at 30, 50, 70 and 90% RH) of humidity sensor obtained from the cross-linked copolymers (solid symbol) METAC/TSPM/2-EHA = 4/2/4 (about 9.6 m) and (hollow symbol) METAC/TSPM/2-EHA = 4/1/5 (6.8 m) after soaking in water.

S2. Long-term stability of the sensor under 90% RH at 80 °C measured at (■) 50% RH and (□) 70% RH of humidity sensor obtained from the cross-linked copolymer METAC/TSPM/2-EHA = 4/2/4.
